# Gender-specification lifestyle factors associated with mild cognitive impairment among young-old adults in Taiwan

Su-Wen Chuang<sup>1,2</sup>, Ching-Wen Chen<sup>2</sup>, Meng-Chang Lee<sup>2</sup>, Yu-Hsuan Chen<sup>2</sup>, Wen Su<sup>3</sup>,  
Cheng-Jung Chen<sup>4,5</sup>, Wei-Teing Chen<sup>6,7</sup>, Po-Jen Hsiao<sup>8,9</sup>, Chih-Chien Chiu<sup>10,11</sup>, Sui-Lung Su<sup>1,2</sup>

<sup>1</sup>Graduate Institute of Life Sciences, National Defense Medical Center, Taipei, Taiwan, ROC

<sup>2</sup>School of Public Health, National Defense Medical Center, Taipei, Taiwan, ROC

<sup>3</sup>Graduate Institute of Aerospace and Undersea Medicine, National Defense Medical Center, Taipei, Taiwan, ROC

<sup>4</sup>Division of General Surgery, Department of Surgery, Tri-Service General Hospital, National Defense Medical Center, Taipei, Taiwan, ROC

<sup>5</sup>Taichung Veterans General Hospital Chiayi Branch, Chiayi City, Taiwan, ROC

<sup>6</sup>Division of Thoracic Medicine, Department of Medicine, Cheng Hsin General Hospital, Taipei, Taiwan, ROC

<sup>7</sup>Department of Medicine, Tri-Service General Hospital, National Defense Medical Center, Taipei, ROC, Taiwan, ROC

<sup>8</sup>Division of Nephrology, Department of Medicine, Taoyuan Armed Forces General Hospital, Taoyuan, Taiwan, ROC

<sup>9</sup>Division of Nephrology, Department of Medicine, Tri-Service General Hospital, National Defense Medical Center, Taipei, Taiwan, ROC

<sup>10</sup>Division of Infectious Disease, Department of Internal Medicine, Taoyuan Armed Forces General Hospital, Taoyuan, Taiwan, ROC

<sup>11</sup>Division of Infectious Disease, Department of Internal Medicine, Tri-Service General Hospital, National, Defense Medical Center, Taipei, Taiwan, ROC

**Correspondence to:** Sui-Lung Su; email: [a131419@gmail.com](mailto:a131419@gmail.com), <https://orcid.org/0000-0003-3122-1116>

**Keywords:** young-old, mild cognitive impairment (MCI), MMSE, lifestyle, gender-specification

**Received:** April 4, 2024

**Accepted:** November 15, 2024

**Published:** December 10, 2024

**Copyright:** © 2024 Chuang et al. This is an open access article distributed under the terms of the [Creative Commons Attribution License](https://creativecommons.org/licenses/by/4.0/) (CC BY 4.0), which permits unrestricted use, distribution, and reproduction in any medium, provided the original author and source are credited.

## ABSTRACT

**Background:** The prevalence of mild cognitive impairment (MCI) exhibits a positive correlation with age, particularly evident in the old-old female population. Lifestyle factors have been identified as crucial risk determinants for MCI. However, there is a scarcity of research focusing on lifestyle factors among young-old population.

**Objective:** This study aimed to explore the lifestyle factors associated with MCI in young-old male and female.

**Methods:** This study employed a cross-sectional design and utilized demographic and lifestyle data obtained from participants enrolled in the Taiwan Biobank (TWB) between 2008 and 2021, with 32,897 individuals aged 60 to 70 years old. Cognitive function was assessed using the Mini-Mental State Examination (MMSE), with a total score ranging from 0 to 30 points. The cut-off of MCI scores was  $\leq 18$ ,  $\leq 21$ , and  $\leq 25$  according to the education level, respectively. Logistic regression analysis was employed to assess the association between lifestyles and cognitive function.

**Results:** 3,878 individuals (11.78%) suffered from MCI. Upon gender stratification, high exercise metabolic equivalents in male (OR = 0.8, 95% CI: 0.70 - 0.92) and moderate exercise in female serve as protective factors for MCI (OR = 0.78, 95% CI: 0.70 - 0.87). Additionally, diversified dietary preferences among female (OR = 0.80, 95% CI: 0.66 - 0.97) also emerge as protective factors for cognitive function.

**Conclusions: It is worth noting that male is advised to target a higher exercise metabolic equivalent, while female can attain cognitive benefits with moderate exercise and diversified dietary.**

## INTRODUCTION

Aging has become a significant concern for most countries in recent years. In older adults, mild cognitive impairment (MCI) has been recognized to be one of the causes of elevated risk of mortality and morbidity globally. Besides, it is significantly taxing to the affected individuals, their caregivers, and society as a whole [1].

Given the absence of efficacious treatment options, early intervention is deemed the most cost-effective approach for dementia management [2]. As MCI is the transitional phase between uninjured cognitive function and dementia [3], it is beneficial to intervene in this phase, especially in young-old population, to prevent the onset of dementia [4].

While genetic inheritance is a significant risk factor for MCI or dementia, such as APOE  $\epsilon$ 4 and MTHFR [5, 6], some studies reveal that both lifestyle and genetic risk are independently linked to the risk of MCI [7]. Those findings show that an unhealthy lifestyle is associated with an increased risk of MCI, regardless of genetic factors [7, 8]. However, increasing research suggests that adopting a healthy lifestyle (such as not smoking, limiting alcohol consumption, maintaining a healthy weight, following a high-quality diet, and engaging in physical exercise) can reduce or delay the onset of cognitive impairment [9].

There is a plethora of research on the association between lifestyles and MCI in old-old population [10–12], but fewer studies have specifically focused on the young-old stage which may be a golden period to intervene and prevent. In studies conducted within the old-old population, an increased prevalence of MCI in females compared to males was observed, signifying a gender disparity [13]. Gaining insights into the gender-specific differences in young-old adults could contribute to a more profound comprehension of the etiology and preventive measures for dementia.

However, the effects of modifiable lifestyle factors on cognitive health have not been comprehensively investigated in Taiwanese young-old adults. It is necessary to systematically investigate and analyze this problem in a large community-based population. A prevention strategy should be developed to target the identified risk factors in the MCI population to

decelerate disease progression. Therefore, this explores the role of different lifestyle factors in the prevention or development of MCI in the Taiwan Biobank (TWB) young-old male and female.

## MATERIALS AND METHODS

### Study design and population

This study data were derived from the TWB, an ongoing community-based prospective cohort study initiated in 2012, involving around 200,000 participants aged 20–70 years recruited from various regions across Taiwan. Following their informed consent to participate in the TWB study, participants undergo a physical examination and a structured questionnaire conducted by a well-trained researcher [14].

This study adopts a cross-sectional design, comprising structured questionnaire and physical examination of 143,069 participants from the TWB collected between December 2008 and May 2021. The research flow chart, as illustrated in Figure 1, involves excluding participants under the age of 60, those with missing data on MMSE (Mini-Mental State Examination) and education level, as well as individuals with mental disorders such as dementia, bipolar disorder, schizophrenia, epilepsy, multiple sclerosis, and Parkinson's disease. Eventually, the study included 32,897 participants, who were divided into MCI ( $n = 3,878$ ) and cognitively normal groups ( $n = 29,019$ ) according to the MMSE score [15].

### Demographic factors

The demographic data includes gender, age, marital status, educational level, Body Mass Index (BMI), hypertension, hyperlipidemia, stroke, and diabetes.

### Lifestyle factors

In the lifestyle dataset, smoking was categorized as “yes” (including individuals who quit smoking less than 20 years ago) or “no” (including quitting more than 20 years). Alcohol consumption was defined as the consumption of 150 ml or more per week for at least 6 months, categorized as “yes” (including abstinence) or “no”. Tea consumption was defined as at least once a day, categorized as “yes” or “no”. Similarly, coffee consumption was defined as at least three times a week,

categorized as “yes” or “no”. Supplement consumption was defined as the presence or absence of vitamins, minerals, or other supplements in the last month, categorized as “yes” or “no”.

The dietary patterns were derived from responses to 17 questions regarding food intake preferences using a five-point scale (1 = never, 2 = seldom, 3 = sometimes, 4 = frequently, and 5 = always). Dimension reduction was accomplished through factor analysis based on principal components analysis (PCA), and the components matrix shown in Supplementary Table 1. Several factors were determined according to the result of PCA. The interpretation of each factor was based on food categories with factor loadings greater than 0.5 after rotation. Ultimately, three dietary patterns were identified: meat-based, flavor-based, and fat-based dietary patterns. The “meat-based” factor represents preferences for lean meat, lower-fat content meat, and non-red meats. The “flavor-based” factor represents preferences for added seasonings, pickled vegetables, and fermented tofu, indicating a more diverse diet. The “fat-based” factor represents preferences for fried cooking methods and consumption of fatty meats and skin. Additionally, the scores for each dietary pattern were categorized into quartiles.

Exercise habits refer to asking participants whether they engage in regular physical activity, defined as exercising at least three times per week for more than 30 minutes per session. We used the most three common exercise types in the past three months self-reported by the participants to calculate the metabolic equivalent of task (MET), detailed in Supplementary Table 2 [16]. The accumulation of exercise activity was defined as the sum of MET per week, which was divided into none,  $\leq 20$  MET/week, and  $> 20$  MET/week. The exercise intensity levels were based on the Physical Activity Guidelines for Americans (PAG). According to PAG, participants were divided into three groups: group1: no exercise habit or only conduct light-intensity physical activity ( $< 3$  MET/hr); group2: conduct physical activities including moderate-intensity physical activity (3-5.9 MET/hr); and group3: conduct physical activity including vigorous-intensity physical activity ( $\geq 6$  MET/hr) [17].

### Assessment of mild cognitive impairment

Cognitive impairment was assessed by the Mini-Mental State Examination (MMSE) according to the definition [18]. The evaluation items include orientation, attention,

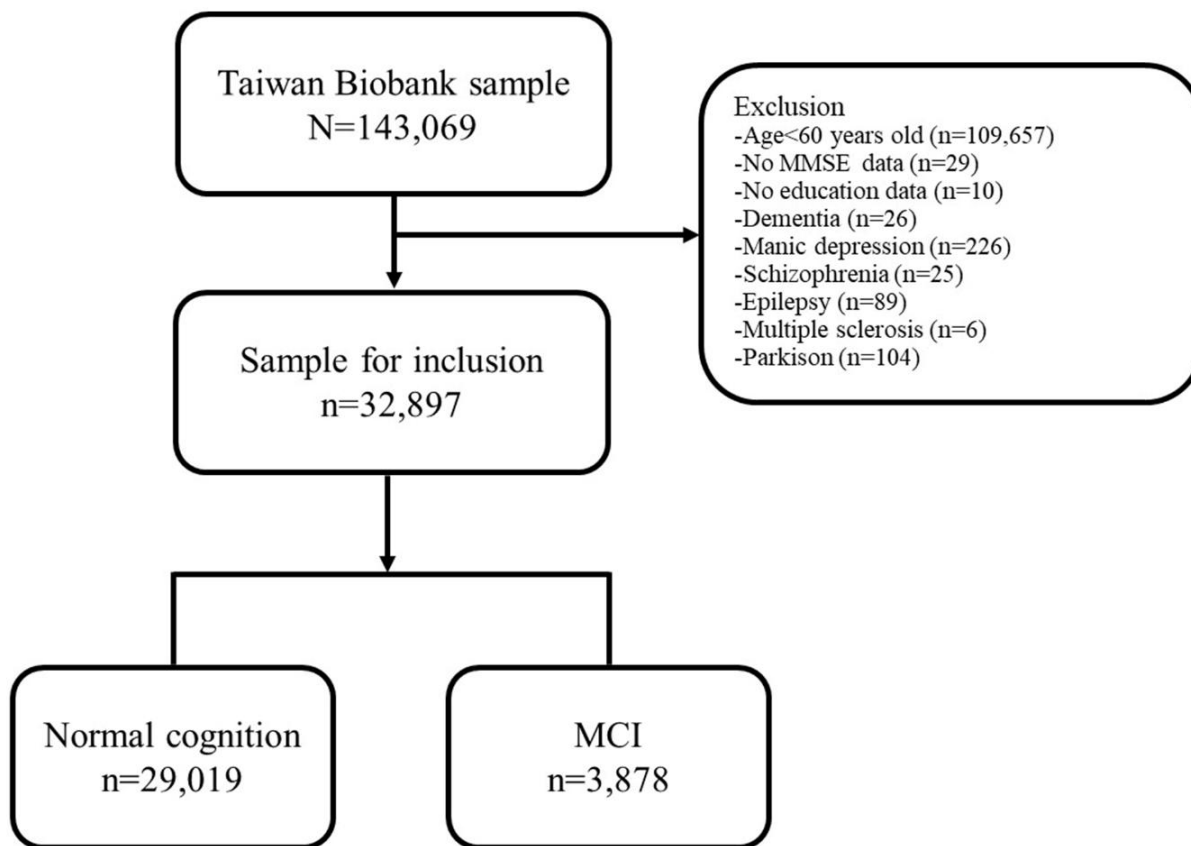

Figure 1. Flow chart of the participants included in TWB. Abbreviation: TWB, Taiwan Biobank; MCI, Mild Cognitive Impairment.

memory, language, oral comprehension and behavior ability, construction ability, and other items. The scores of MMSE range from 0 to 30, and higher scores indicate better cognitive function. The cut-off scores for MCI were defined as scores  $\leq 18$  for illiterates,  $\leq 21$  for participants with primary school education, and  $\leq 25$  for those with junior high school degree or above [15].

### Ethical issues and subjects

This study was authorized by the institutional review board of the Tri-Service General Hospital (TSGH-2-107-05-091). Written informed consent was not required for this study in accordance with national legislation and institutional requirements.

### Statistical analysis

For descriptive statistical methods, the study variables were presented in the following manners: (1) categorical (nominal) variables: the number of distributions and ratios; and (2) interval and ratio variables: average, and standard deviation. For inferential statistical methods, the single-variable analysis included Student's t-test, and  $\chi^2$  test to compare the demographic data and lifestyle data between cognitive normal and MCI participants, while logistic regression was used to adjust for possible confounding factors. This study considered a p-value of  $< 0.05$  as significance for all analyses. All analyses were performed using R 3.5.2.

### Availability of data and materials

The data supporting the findings of this study are available from Taiwan Biobank (<https://www.twbiobank.org.tw>). According to Taiwan Biobank's policy, the availability of these data is restricted. These data are used under the license of the current study and therefore not public.

## RESULTS

### Demographic characteristics

The demographic characteristics of participants were summarized in Table 1. The total number of participants was 32,897, with 39.1% male and 60.9% female. The average age of the participants was  $64.03 \pm 2.96$  years. In the cognitively normal group, which constituted 88.22% of the total population, the average age was  $63.99 \pm 2.94$  years. In the group with MCI, which accounted for 11.78% of the total population, the average age was slightly higher at  $64.31 \pm 3.08$  years. The MCI group was characterized by older age ( $p < 0.001$ ), lower proportion of married individuals

( $p < 0.001$ ), lower educational levels ( $p < 0.001$ ), and higher body mass index (BMI) ( $p < 0.001$ ) compared to that of normal group. Meanwhile, the MCI group also had a higher prevalence of hypertension ( $p < 0.001$ ), diabetes ( $p < 0.001$ ), and stroke ( $p < 0.001$ ).

### Lifestyle characteristics

The lifestyle characteristics of participants are presented in Table 2. Compared to the normal group, the MCI group displayed the following distinctions: higher smoking prevalence ( $p = 0.008$ ), a greater number of non-coffee drinkers ( $p < 0.001$ ), a lower percentage of individuals using dietary supplements ( $p = 0.045$ ), and more individuals with no exercise ( $p < 0.001$ ).

### Lifestyle risk factors for MCI

The lifestyle factors associated with MCI, as presented in Table 3, were analyzed after adjusting for age, gender, hypertension, diabetes, stroke, and hyperlipidemia. Smokers and former smokers exhibited a 1.19-fold higher risk of MCI (OR = 1.19, 95% CI: 1.07-1.33). Furthermore, participants who reported a habit of drinking coffee and taking dietary supplements demonstrated a lower risk of MCI. The risk of MCI was 28% lower for coffee drinkers (OR = 0.72, 95% CI: 0.64-0.80) and 12% lower for dietary supplement consumers (OR = 0.88, 95% CI: 0.79-0.98). Individuals who maintained a regular physical activity routine showed a 15% reduction in the risk of MCI (OR = 0.85, 95% CI: 0.80-0.91). Regardless of whether their weekly physical activity MET exceeded or was equal to 20 METs, participants experienced a decreased risk of MCI, with a 19% reduction in risk for those with METs/week  $\leq 20$  (OR = 0.81, 95% CI: 0.75-0.89) and a 11% reduction for those with METs/week  $> 20$  (OR = 0.89, 95% CI: 0.82-0.97). Regarding exercise types, individuals with physical activity including moderate-intensity physical activity had a 13% lower risk of MCI compared to those without exercise habit or only conduct light-intensity physical activity (OR = 0.87, 95% CI: 0.81-0.93). We additionally used two variables of physical activity (physical activity intensity levels and accumulation of physical activity per week) to conduct a cross-table analysis (Supplementary Table 3). In summary, participants with moderate-intensity physical activity and accumulation of metabolic equivalents of task  $\leq 20$  per week had a significantly lower risk of MCI (OR = 0.80, 95% CI: 0.73-0.88).

### Lifestyle risk factors stratified by gender for MCI

The lifestyle factors affecting MCI in different genders are presented in Table 4 after adjusting for age,

**Table 1. Demographic of participants with/without MCI.**

| Variable                       | Total (n=32,897) | MMSE <sup>a</sup> |               | p-value |
|--------------------------------|------------------|-------------------|---------------|---------|
|                                |                  | Normal (n=29,019) | MCI (n=3,878) |         |
| Sex                            |                  |                   |               | 0.594   |
| Male                           | 12,862 (39.1%)   | 11,361 (39.2%)    | 1,501 (38.7%) |         |
| Female                         | 20,035 (60.9%)   | 17,658 (60.8%)    | 2,377 (61.3%) |         |
| Age (y)                        | 64.03±2.96       | 63.99±2.94        | 64.31±3.08    | <0.001  |
| Marital status                 |                  |                   |               | <0.001  |
| Married                        | 25,488 (77.5%)   | 22,590 (77.9%)    | 2,898 (74.8%) |         |
| Unmarried/Widow/Divorced       | 7,390 (22.5%)    | 6,414 (22.1%)     | 976 (25.2%)   |         |
| Educational levels             |                  |                   |               | <0.001  |
| Junior high school above (>6y) | 27,890 (84.8%)   | 24,720 (85.2%)    | 3,170 (81.7%) |         |
| Primary school (≤6y)           | 4,826 (14.7%)    | 4,196 (14.5%)     | 630 (16.2%)   |         |
| Illiteracy                     | 181 (0.6%)       | 103 (0.4%)        | 78 (2.0%)     |         |
| Education                      |                  |                   |               | <0.001  |
| ≤12 y                          | 19,136(58.2%)    | 16,152(55.7%)     | 2,984(76.9%)  |         |
| >12 y                          | 13,761(41.8%)    | 12,867(44.3%)     | 894(23.1%)    |         |
| BMI (kg/m <sup>2</sup> )       | 24.36±3.38       | 24.31±3.37        | 24.74±3.46    | <0.001  |
| Hypertension                   | 8,273 (25.1%)    | 7,175 (24.7%)     | 1,098 (28.3%) | <0.001  |
| Diabetes                       | 3,621 (11.0%)    | 3,117 (10.7%)     | 504 (13.0%)   | <0.001  |
| Stroke                         | 447 (1.4%)       | 367 (1.3%)        | 80 (2.1%)     | <0.001  |
| Hyperlipidemia                 | 4,823 (14.7%)    | 4,299 (14.8%)     | 524 (13.5%)   | 0.031   |

<sup>a</sup>MCI was defined as a score ≤18 for illiterates, ≤21 for participants with primary school education, and ≤25 for those with junior high school degree or above.

**Table 2. Lifestyle of participants with/without MCI.**

| Variable                        | Total (n=32,897) | MMSE <sup>a</sup> |               | p-value |
|---------------------------------|------------------|-------------------|---------------|---------|
|                                 |                  | Normal (n=29,019) | MCI (n=3,878) |         |
| Smoking                         |                  |                   |               | 0.008   |
| None                            | 26,459 (85.5%)   | 23,358 (85.7%)    | 3,101 (84.0%) |         |
| Current/Former                  | 4,497 (14.5%)    | 3,908 (14.3%)     | 589 (16.0%)   |         |
| Alcohol consumption             |                  |                   |               | 0.747   |
| None                            | 29,880 (90.9%)   | 26,364 (90.9%)    | 3,516 (90.7%) |         |
| Current/Former                  | 3,000 (9.1%)     | 2,641 (9.1%)      | 359 (9.3%)    |         |
| Tea consumption                 |                  |                   |               | 0.28    |
| No                              | 8,345 (74.6%)    | 7,171 (74.8%)     | 1,174 (73.6%) |         |
| Yes                             | 2,834 (25.4%)    | 2,412 (25.2%)     | 422 (26.4%)   |         |
| Coffee consumption              |                  |                   |               | <0.001  |
| No                              | 7,237 (64.7%)    | 6,101 (63.7%)     | 1,136 (71.2%) |         |
| Yes                             | 3,942 (35.3%)    | 3,483 (36.3%)     | 459 (28.8%)   |         |
| Dietary supplements consumption |                  |                   |               | 0.045   |
| None                            | 4,325 (38.7%)    | 3,671 (38.3%)     | 654 (41.0%)   |         |
| Regular/Irregular               | 6,848 (61.3%)    | 5,906 (61.7%)     | 942 (59.0%)   |         |
| Meat intake preferences         |                  |                   |               | 0.605   |
| Q1                              | 2,792 (25.0%)    | 2,381 (24.9%)     | 411 (25.8%)   |         |
| Q2                              | 2,792 (25.0%)    | 2,408 (25.1%)     | 384 (24.1%)   |         |
| Q3                              | 2,792 (25.0%)    | 2,405 (25.1%)     | 387 (24.3%)   |         |
| Q4                              | 2,792 (25.0%)    | 2,382 (24.9%)     | 410 (25.8%)   |         |

|                                          |                |                |               |        |
|------------------------------------------|----------------|----------------|---------------|--------|
| Favor intake preferences                 |                |                |               | 0.156  |
| Q1                                       | 2,792 (25.0%)  | 2,364 (24.7%)  | 428 (26.9%)   |        |
| Q2                                       | 2,792 (25.0%)  | 2,385 (24.9%)  | 407 (25.6%)   |        |
| Q3                                       | 2,792 (25.0%)  | 2,409 (25.2%)  | 383 (24.1%)   |        |
| Q4                                       | 2,792 (25.0%)  | 2,418 (25.3%)  | 374 (23.5%)   |        |
| Dietary fat intake preferences           |                |                |               | 0.727  |
| Q1                                       | 2,792 (25.0%)  | 2,381 (24.9%)  | 411 (25.8%)   |        |
| Q2                                       | 2,792 (25.0%)  | 2,409 (25.2%)  | 383 (24.1%)   |        |
| Q3                                       | 2,792 (25.0%)  | 2,398 (25.0%)  | 394 (24.7%)   |        |
| Q4                                       | 2,792 (25.0%)  | 2,388 (24.9%)  | 404 (25.4%)   |        |
| Exercise habits                          |                |                |               | <0.001 |
| No                                       | 16,952 (51.6%) | 14,818 (51.1%) | 2,134 (55.0%) |        |
| Yes                                      | 15,931 (48.4%) | 14,188 (48.9%) | 1,743 (45.0%) |        |
| Physical Activity Accumulation           |                |                |               | <0.001 |
| None                                     | 16,952 (51.6%) | 14,818 (51.1%) | 2,134 (55.0%) |        |
| ≤20 METs/week                            | 7,876 (24.0%)  | 7,052 (24.3%)  | 824 (21.3%)   |        |
| >20 METs/week                            | 8,055 (24.5%)  | 7,136 (24.6%)  | 919 (23.7%)   |        |
| Physical Activity Intensity <sup>b</sup> |                |                |               | <0.001 |
| Group 1                                  | 18,104 (55.1%) | 15,849 (54.6%) | 2,255 (58.2%) |        |
| Group 2                                  | 12,945 (39.4%) | 11,523 (39.7%) | 1,422 (36.7%) |        |
| Group 3                                  | 1,834 (5.6%)   | 1,634 (5.6%)   | 200 (5.2%)    |        |

<sup>a</sup>MCI was defined as a score ≤18 for illiterates, ≤21 for participants with primary school education, and ≤25 for those with junior high school degree or above.

<sup>b</sup>Group1: no exercise habit or only conduct light-intensity physical activity (<3 MET/hr).

Group2: conduct physical activities including moderate-intensity physical activity (3-5.9 MET/hr).

Group3: physical activity including vigorous-intensity physical activity (≥6 MET/hr).

**Table 3. Identification of lifestyle risk factors for MCI using logistic regression.**

| Variable                        | Logistic regression, OR of MCI <sup>a</sup> (95% CI) |                      |                      |
|---------------------------------|------------------------------------------------------|----------------------|----------------------|
|                                 | Crude                                                | Model 1 <sup>c</sup> | Model 2 <sup>d</sup> |
| Smoking                         |                                                      |                      |                      |
| None                            | Ref.                                                 | Ref.                 | Ref.                 |
| Current/Former                  | 1.14 (1.03 - 1.25)*                                  | 1.20 (1.08 - 1.34)*  | 1.19 (1.07 - 1.33)*  |
| Alcohol consumption             |                                                      |                      |                      |
| None                            | Ref.                                                 | Ref.                 | Ref.                 |
| Current/Former                  | 1.02 (0.91 - 1.14)                                   | 1.04 (0.92 - 1.18)   | 1.03 (0.91 - 1.16)   |
| Tea consumption                 |                                                      |                      |                      |
| No                              | Ref.                                                 | Ref.                 | Ref.                 |
| Yes                             | 1.07 (0.95 - 1.21)                                   | 1.10 (0.97 - 1.24)   | 1.09 (0.96 - 1.23)   |
| Coffee consumption              |                                                      |                      |                      |
| No                              | Ref.                                                 | Ref.                 | Ref.                 |
| Yes                             | 0.71 (0.63 - 0.79)*                                  | 0.72 (0.64 - 0.80)*  | 0.72 (0.64 - 0.80)*  |
| Dietary supplements consumption |                                                      |                      |                      |
| None                            | Ref.                                                 | Ref.                 | Ref.                 |
| Regular/Irregular               | 0.90 (0.80 - 1.00)*                                  | 0.87 (0.78 - 0.97)*  | 0.88 (0.79 - 0.98)*  |
| Meat intake preferences         |                                                      |                      |                      |
| Q1                              | Ref.                                                 | Ref.                 | Ref.                 |
| Q2                              | 0.92 (0.79 - 1.07)                                   | 0.92 (0.79 - 1.07)   | 0.92 (0.79 - 1.07)   |
| Q3                              | 0.93 (0.80 - 1.08)                                   | 0.92 (0.79 - 1.07)   | 0.92 (0.79 - 1.07)   |

|                                          |                     |                     |                     |
|------------------------------------------|---------------------|---------------------|---------------------|
| Q4                                       | 1.00 (0.86 - 1.16)  | 0.99 (0.85 - 1.15)  | 0.99 (0.85 - 1.15)  |
| Favor intake preferences                 |                     |                     |                     |
| Q1                                       | Ref.                | Ref.                | Ref.                |
| Q2                                       | 0.94 (0.81 - 1.09)  | 0.94 (0.81 - 1.09)  | 0.94 (0.81 - 1.09)  |
| Q3                                       | 0.88 (0.76 - 1.02)  | 0.88 (0.76 - 1.02)  | 0.88 (0.76 - 1.03)  |
| Q4                                       | 0.85 (0.74 - 0.99)* | 0.87 (0.75 - 1.01)  | 0.87 (0.74 - 1.01)  |
| Dietary fat intake preferences           |                     |                     |                     |
| Q1                                       | Ref.                | Ref.                | Ref.                |
| Q2                                       | 0.92 (0.79 - 1.07)  | 0.93 (0.80 - 1.09)  | 0.94 (0.80 - 1.09)  |
| Q3                                       | 0.95 (0.82 - 1.11)  | 0.96 (0.82 - 1.11)  | 0.96 (0.82 - 1.11)  |
| Q4                                       | 0.98 (0.84 - 1.14)  | 1.00 (0.86 - 1.16)  | 1.00 (0.86 - 1.16)  |
| Exercise habits                          |                     |                     |                     |
| No                                       | Ref.                | Ref.                | Ref.                |
| Yes                                      | 0.85 (0.80 - 0.91)* | 0.84 (0.79 - 0.90)* | 0.85 (0.80 - 0.91)* |
| Physical Activity Accumulation           |                     |                     |                     |
| None                                     | Ref.                | Ref.                | Ref.                |
| ≤20 METs/week                            | 0.81 (0.75 - 0.88)* | 0.80 (0.74 - 0.87)* | 0.81 (0.75 - 0.89)* |
| >20 METs/week                            | 0.89 (0.82 - 0.97)* | 0.88 (0.81 - 0.96)* | 0.89 (0.82 - 0.97)* |
| Physical Activity Intensity <sup>b</sup> |                     |                     |                     |
| Group 1                                  | Ref.                | Ref.                | Ref.                |
| Group 2                                  | 0.87 (0.81 - 0.93)* | 0.86 (0.80 - 0.92)* | 0.87 (0.81 - 0.93)* |
| Group 3                                  | 0.86 (0.74 - 1.00)  | 0.87 (0.74 - 1.01)  | 0.88 (0.75 - 1.03)  |

<sup>a</sup>MCI was defined as a score ≤18 for illiterates, ≤21 for participants with primary school education, and ≤25 for those with junior high school degree or above.

<sup>b</sup>Group1: no exercise habit or only conduct light-intensity physical activity (<3 MET/hr).

Group2: conduct physical activities including moderate-intensity physical activity (3-5.9 MET/hr).

Group3: physical activity including vigorous-intensity physical activity (≥6 MET/hr).

<sup>c</sup>Model 1: adjusted by age, gender.

<sup>d</sup>Model 2: adjusted by age, gender, hypertension, diabetes, stroke, hyperlipidemia.

\*p<0.05.

**Table 4. Identification of lifestyle risk factors stratified by gender for MCI using logistic regression.**

| Variable                        | Logistic regression, OR of MCI <sup>a</sup> (95% CI) |                      |                      |                     |                      |                      |
|---------------------------------|------------------------------------------------------|----------------------|----------------------|---------------------|----------------------|----------------------|
|                                 | Male(n=12,862)                                       |                      |                      | Female(n=20,035)    |                      |                      |
|                                 | Crude                                                | Model 1 <sup>c</sup> | Model 2 <sup>d</sup> | Crude               | Model 1 <sup>c</sup> | Model 2 <sup>d</sup> |
| Smoking                         |                                                      |                      |                      |                     |                      |                      |
| None                            | Ref.                                                 | Ref.                 | Ref.                 | Ref.                | Ref.                 | Ref.                 |
| Current/Former                  | 1.19 (1.06 - 1.33)*                                  | 1.21 (1.08 - 1.36)*  | 1.20(1.06 - 1.34)*   | 1.14 (0.84 - 1.56)  | 1.17 (0.86 - 1.61)   | 1.16 (0.85 - 1.59)   |
| Alcohol consumption             |                                                      |                      |                      |                     |                      |                      |
| None                            | Ref.                                                 | Ref.                 | Ref.                 | Ref.                | Ref.                 | Ref.                 |
| Current/Former                  | 1.02 (0.89 - 1.17)                                   | 1.03 (0.90 - 1.18)   | 1.01 (0.89 - 1.16)   | 1.10 (0.82 - 1.47)  | 1.11 (0.83 - 1.48)   | 1.10 (0.82 - 1.48)   |
| Tea consumption                 |                                                      |                      |                      |                     |                      |                      |
| No                              | Ref.                                                 | Ref.                 | Ref.                 | Ref.                | Ref.                 | Ref.                 |
| Yes                             | 1.15 (0.97 - 1.38)                                   | 1.17 (0.98 - 1.40)   | 1.16 (0.97 - 1.38)   | 1.03 (0.86 - 1.22)  | 1.04 (0.87 - 1.23)   | 1.03 (0.87 - 1.23)   |
| Coffee consumption              |                                                      |                      |                      |                     |                      |                      |
| No                              | Ref.                                                 | Ref.                 | Ref.                 | Ref.                | Ref.                 | Ref.                 |
| Yes                             | 0.72 (0.60 - 0.86)*                                  | 0.73 (0.60 - 0.87)*  | 0.73 (0.61 - 0.88)*  | 0.70 (0.60 - 0.82)* | 0.71 (0.61 - 0.82)*  | 0.71 (0.61 - 0.82)*  |
| Dietary supplements consumption |                                                      |                      |                      |                     |                      |                      |
| None                            | Ref.                                                 | Ref.                 | Ref.                 | Ref.                | Ref.                 | Ref.                 |
| Regular/Irregular               | 0.89 (0.75 - 1.05)                                   | 0.88 (0.74 - 1.04)   | 0.89 (0.75 - 1.05)   | 0.88 (0.76 - 1.01)  | 0.87 (0.75 - 1.00)   | 0.87 (0.76 - 1.01)   |
| Meat intake preferences         |                                                      |                      |                      |                     |                      |                      |

|                                          |                     |                     |                     |                     |                     |                     |
|------------------------------------------|---------------------|---------------------|---------------------|---------------------|---------------------|---------------------|
| Q1                                       | Ref.                | Ref.                | Ref.                | Ref.                | Ref.                | Ref.                |
| Q2                                       | 0.85 (0.68 - 1.07)  | 0.85 (0.68 - 1.07)  | 0.84 (0.67 - 1.06)  | 0.98 (0.80 - 1.20)  | 0.98 (0.80 - 1.20)  | 0.98 (0.80 - 1.21)  |
| Q3                                       | 0.95 (0.75 - 1.20)  | 0.94 (0.74 - 1.19)  | 0.94 (0.75 - 1.19)  | 0.92 (0.75 - 1.12)  | 0.92 (0.75 - 1.12)  | 0.92 (0.75 - 1.12)  |
| Q4                                       | 0.93 (0.73 - 1.19)  | 0.93 (0.72 - 1.19)  | 0.93 (0.72 - 1.19)  | 1.02 (0.84 - 1.24)  | 1.03 (0.85 - 1.24)  | 1.03 (0.85 - 1.25)  |
| Favor intake preferences                 |                     |                     |                     |                     |                     |                     |
| Q1                                       | Ref.                | Ref.                | Ref.                | Ref.                | Ref.                | Ref.                |
| Q2                                       | 0.99 (0.77 - 1.27)  | 0.99 (0.77 - 1.28)  | 1.00 (0.77 - 1.28)  | 0.92 (0.77 - 1.11)  | 0.92 (0.76 - 1.10)  | 0.91 (0.76 - 1.10)  |
| Q3                                       | 0.95 (0.74 - 1.22)  | 0.96 (0.75 - 1.23)  | 0.96 (0.75 - 1.23)  | 0.85 (0.70 - 1.02)  | 0.84 (0.70 - 1.02)  | 0.84 (0.70 - 1.02)  |
| Q4                                       | 0.97 (0.76 - 1.23)  | 0.98 (0.77 - 1.25)  | 0.98 (0.77 - 1.25)  | 0.79 (0.65 - 0.96)* | 0.80 (0.66 - 0.97)* | 0.80 (0.66 - 0.97)* |
| Dietary fat intake preferences           |                     |                     |                     |                     |                     |                     |
| Q1                                       | Ref.                | Ref.                | Ref.                | Ref.                | Ref.                | Ref.                |
| Q2                                       | 0.83 (0.63 - 1.08)  | 0.83 (0.63 - 1.08)  | 0.83 (0.63 - 1.08)  | 0.97 (0.81 - 1.17)  | 0.99 (0.82 - 1.18)  | 0.99 (0.82 - 1.18)  |
| Q3                                       | 0.86 (0.67 - 1.11)  | 0.85 (0.66 - 1.10)  | 0.86 (0.66 - 1.11)  | 1.01 (0.84 - 1.22)  | 1.02 (0.84 - 1.22)  | 1.01 (0.84 - 1.22)  |
| Q4                                       | 0.95 (0.74 - 1.21)  | 0.95 (0.74 - 1.21)  | 0.95 (0.74 - 1.21)  | 1.00 (0.82 - 1.21)  | 1.01 (0.83 - 1.22)  | 1.00 (0.82 - 1.22)  |
| Exercise habits                          |                     |                     |                     |                     |                     |                     |
| No                                       | Ref.                | Ref.                | Ref.                | Ref.                | Ref.                | Ref.                |
| Yes                                      | 0.84 (0.75 - 0.93)* | 0.83 (0.74 - 0.92)* | 0.84 (0.75 - 0.93)* | 0.86 (0.79 - 0.94)* | 0.85 (0.78 - 0.93)* | 0.87 (0.80 - 0.95)* |
| Physical Activity Accumulation           |                     |                     |                     |                     |                     |                     |
| None                                     | Ref.                | Ref.                | Ref.                | Ref.                | Ref.                | Ref.                |
| ≤20 METs/week                            | 0.87 (0.76 - 1.00)  | 0.87 (0.75 - 1.00)  | 0.88 (0.76 - 1.01)  | 0.78 (0.70 - 0.87)* | 0.77 (0.69 - 0.86)* | 0.78 (0.70 - 0.87)* |
| >20 METs/week                            | 0.81 (0.71 - 0.92)* | 0.79 (0.69 - 0.90)* | 0.80 (0.70 - 0.92)* | 0.96 (0.87 - 1.07)  | 0.95 (0.86 - 1.06)  | 0.97 (0.87 - 1.07)  |
| Physical Activity Intensity <sup>b</sup> |                     |                     |                     |                     |                     |                     |
| Group 1                                  | Ref.                | Ref.                | Ref.                | Ref.                | Ref.                | Ref.                |
| Group 2                                  | 0.83 (0.74 - 0.94)* | 0.82 (0.73 - 0.92)* | 0.83 (0.74 - 0.93)* | 0.89 (0.81 - 0.97)* | 0.88 (0.80 - 0.96)* | 0.89 (0.81 - 0.97)  |
| Group 3                                  | 0.82 (0.67 - 1.00)* | 0.82 (0.67 - 1.00)  | 0.83 (0.68 - 1.01)  | 0.93 (0.73 - 1.20)  | 0.94 (0.73 - 1.20)  | 0.96 (0.75 - 1.23)  |

<sup>a</sup>MCI was defined as a score ≤18 for illiterates, ≤21 for participants with primary school education, and ≤25 for those with junior high school degree or above.

<sup>b</sup>Group 1: no exercise habit or only conduct light-intensity physical activity (<3 MET/hr).

Group 2: conduct physical activities including moderate-intensity physical activity (3-5.9 MET/hr).

Group 3: physical activity including vigorous-intensity physical activity (≥6 MET/hr).

<sup>c</sup>Model 1: adjusted by age.

<sup>d</sup>Model 2: adjusted by age, hypertension, diabetes, stroke, hyperlipidemia.

\*p<0.05.

hypertension, diabetes, stroke, and hyperlipidemia. Among males, smokers had a 1.2-fold higher risk of MCI (OR = 1.2, 95% CI: 1.06-1.34), while this association was not observed in females (OR = 1.16, 95% CI: 0.85-1.59). Diverse flavored intake pattern (Q4) in female, compared to Q1, was associated with cognitive protection (OR = 0.8, 95% CI: 0.66-0.97). Additionally, in terms of physical activity accumulation, METs/week >20 in male (OR = 0.8, 95% CI: 0.70-0.92) and METs/week ≤20 in female (OR = 0.78, 95% CI: 0.70-0.87) acted as protective factors for MCI.

## DISCUSSION

This study reveals that the prevalence of MCI among individuals aged 60 and above is 11.78%. It demonstrates the role of former or current smoking as a risk factor for MCI. In contrast, maintaining a regular exercise routine, consuming coffee, and using dietary supplements are identified as protective factors for MCI. Furthermore, the research highlights the gender-specific differences in

lifestyle factors and their impact on cognitive function. For males, engaging in high-intensity physical activity is beneficial for cognitive function, implying that males may benefit from more intense or longer-duration physical activities to reduce their risk of MCI. On the other hand, for females, moderate physical activity and a diverse flavored intake pattern appear to be more supportive of cognitive function.

The prevalence of MCI increases significantly with advancing age [19]. Article conducted in Taiwan reveals a higher prevalence among females compared to males [20], whereas research in China indicates a steeper rise in prevalence with age among females compared to males [21]. In the current study, the prevalence ratios of males and females in the young-old group were similar (male 11.67%, female 11.86%), and consistent with prior research findings.

Numerous studies have indicated that higher levels of physical activity contribute to improved learning and



memory [22, 23]. Epidemiological research suggests that regular physical activity can reduce the risk of cognitive decline in older adults [24, 25]. Our study also verifies this finding. Considering that physical activity can alter neural plasticity, promote the maintenance and growth of neurons, and influence synaptic connectivity [26], this emphasizes the importance of maintaining regular exercise with advancing age.

Notably, in addition to the influence of exercise routines, our findings also underline gender disparities in weekly exercise MET levels. Higher levels of physical activity METs per week in males and moderate levels in females were identified as protective factors in MCI. Previous study reported that different exercise interventions influence cognition and brain health in older adults and these effects may be gender dependent [27]. The biological mechanisms underlying the beneficial effects of exercise on the brain may be different in males and females, such as brain-derived neurotrophic factor (BDNF) is a critical mediator of the beneficial effect of exercise on brain function [28, 29], BDNF facilitates cognition performance through modulation of neurotransmission. However, exercise increased levels of BDNF in females but decreased levels in males [30]. This may explain the divergent contribution of physical activity to the phenotype of MCI in male and female.

Previous study showed that high dietary diversity was associated with a lower proportion of MCI [31], which is consistent with our finding in female. Females prefer to have diverse tastes may positively stimulate neural feedback to make it more beneficial in neuroplasticity [32]. Moreover, the diversity of food selection implies the intake of more varied and sufficient nutrients, potentially exerting a protective effect against brain aging through neural stimulation. The potential mechanisms of the present findings might involve the complex effects of various nutrients on cognitive function due to diet diversity. First, a previous study reported that calcium and magnesium reduce the risk of developing dementia [33]. Second, the intake of amino acids, especially lysine, phenylalanine, threonine, and alanine, is positively associated with cognitive function in late life [34]. Third, a large prospective cohort study showed that a high consumption of fish was associated with a lower risk of dementia [35]. However, there is no significant association between flavor diet and MCI in male, which may be due to the gender differences in taste and food habits. Future studies should validate the gender difference mentioned in this study.

A community study in the US suggested that current smokers had 1.33 times (95% CI: 1.12-1.59) the risk of all-cause dementia compared to never smokers, while those who quit smoking in the last 9 years had 1.24

times (95% CI: 1.01-1.52) the risk of all-cause dementia compared to never smokers and quitting for more than 9 years had no association with dementia [36]. Other articles have also found that smokers and former smokers had an increased risk of MCI [37], consistent with the results of our study.

In the context of coffee consumption habits, the Italian longitudinal study on aging has shown that elderly individuals who habitually consume moderate amounts of coffee (1-2 cups per day) have a lower risk of developing MCI compared to those who never or rarely (1 cup per day) consume coffee [38]. This finding aligns with the results of our study and highlights the potential benefits of habitual coffee intake on cognitive function.

Previous research has already established that the intake of antioxidant and anti-inflammatory nutrients such as Omega-3 fatty acids, curcumin, flavonoids, vitamin B12, vitamin D, vitamin E, choline, complex B vitamins, and iron can help combat cognitive decline [39]. Additionally, previous study also suggests that supplementation with vitamin E, magnesium, ginkgo biloba, green tea polyphenols, phospholipids, and polyunsaturated fatty acids (e.g., DHA, EPA) can effectively reduce the incidence of MCI [40]. While our study couldn't specify which dietary supplements are beneficial for cognitive function, the results align with the notion that dietary supplements can have a positive impact on cognitive function. Future studies should analyze the detailed components of supplements to reveal the detailed mechanism.

This study has several limitations. Firstly, this study is a cross-sectional study, which could not explore causal relationships. Secondly, this study relies on self-reported dietary habits of the participants. This approach does not provide specific details about the frequency and quantity of their diet, and dietary characteristics might be subject to personal interpretation. Thirdly, the study population consists of volunteers who participated in the TWB, which might lead to a selection bias. These individuals may have better health awareness and healthier lifestyles, potentially resulting in lower risk profiles compared to the general elderly population.

## CONCLUSIONS

This study reveals that individuals who consume coffee, take dietary supplements, and maintain regular physical activity habits exhibit better cognitive function. It is worth noting that male is advised to target a higher physical activity metabolic equivalent, while female can attain cognitive benefits with moderate physical activity. Moreover, diversified dietary preferences among females but not males serve as protective factors

for cognitive function. In the future, it is recommended to conduct longitudinal studies to explore causal relationships in this regard.

## AUTHOR CONTRIBUTIONS

Sui-Lung Su, Cheng-Jung Chen and Wei-Teing Chen designed the study and obtained funding. Wen Su, Po-Jen Hsiao, and Chih-Chien Chiu collected and assembled data. Ching-Wen Chen performed statistical analyses. All authors interpreted the results. Meng-Chang Lee and Su-Wen Chuang drafted the manuscript. All authors read and approved the final manuscript.

## ACKNOWLEDGMENTS

The authors appreciate all the scientists whose works contributed to this research article.

## CONFLICTS OF INTEREST

The authors declare that they have no conflicts of interest.

## ETHICAL STATEMENT AND CONSENT

This study was performed in accordance with the Declaration of Helsinki and authorized by the institutional review board of the Tri-Service General Hospital (TSGH-2-107-05-091). Written informed consent was obtained from all subjects before participation in the study.

## FUNDING

This study was supported by grants from the Medical Affairs Bureau, Ministry of National Defense (MND-MAB-110-105, MND-MAB-C-11106-111021, MND-MAB-C01-112002 and MND-MAB-C14-113050), Tri-Service General Hospital (TSGH-E-110232, TSGH-D-111099, MND-MAB-D-111132, MND-MAB-D-113108 and TSGH\_D\_113119), Taichung Veterans General Hospital Chiayi Branch (RVHCY113012), Cheng Hsin General Hospital (CHNDMC-113-11201), and Taoyuan Armed Forces General Hospital (TYAFGH\_D\_113032 and TYAFGH\_E\_113052). The funders had no role in the study design, data collection and analysis, decision to publish, or preparation of the manuscript.

## REFERENCES

1. Daviglius ML, Bell CC, Berrettini W, Bowen PE, Connolly ES Jr, Cox NJ, Dunbar-Jacob JM, Granieri EC, Hunt G, McGarry K, Patel D, Potosky AL, Sanders-Bush E, et al. National Institutes of Health State-of-the-Science Conference statement: preventing alzheimer disease and cognitive decline. *Ann Intern Med.* 2010; 153:176–81.  
<https://doi.org/10.7326/0003-4819-153-3-201008030-00260> PMID:[20547888](https://pubmed.ncbi.nlm.nih.gov/20547888/)
2. Livingston G, Sommerlad A, Orgeta V, Costafreda SG, Huntley J, Ames D, Ballard C, Banerjee S, Burns A, Cohen-Mansfield J, Cooper C, Fox N, Gitlin LN, et al. Dementia prevention, intervention, and care. *Lancet.* 2017; 390:2673–734.  
[https://doi.org/10.1016/S0140-6736\(17\)31363-6](https://doi.org/10.1016/S0140-6736(17)31363-6) PMID:[28735855](https://pubmed.ncbi.nlm.nih.gov/28735855/)
3. Winblad B, Palmer K, Kivipelto M, Jelic V, Fratiglioni L, Wahlund LO, Nordberg A, Bäckman L, Albert M, Almkvist O, Arai H, Basun H, Blennow K, et al. Mild cognitive impairment—beyond controversies, towards a consensus: report of the International Working Group on Mild Cognitive Impairment. *J Intern Med.* 2004; 256:240–6.  
<https://doi.org/10.1111/j.1365-2796.2004.01380.x> PMID:[15324367](https://pubmed.ncbi.nlm.nih.gov/15324367/)
4. Shimada H, Makizako H, Doi T, Lee S, Lee S. Conversion and Reversion Rates in Japanese Older People With Mild Cognitive Impairment. *J Am Med Dir Assoc.* 2017; 18:808.e1–6.  
<https://doi.org/10.1016/j.jamda.2017.05.017> PMID:[28711424](https://pubmed.ncbi.nlm.nih.gov/28711424/)
5. Risacher SL, Kim S, Shen L, Nho K, Foroud T, Green RC, Petersen RC, Jack CR Jr, Aisen PS, Koeppe RA, Jagust WJ, Shaw LM, Trojanowski JQ, et al. and Alzheimer's Disease Neuroimaging Initiative (ADNI)†. The role of apolipoprotein E (APOE) genotype in early mild cognitive impairment (E-MCI). *Front Aging Neurosci.* 2013; 5:11.  
<https://doi.org/10.3389/fnagi.2013.00011> PMID:[23554593](https://pubmed.ncbi.nlm.nih.gov/23554593/)
6. Religa D, Styczynska M, Peplonska B, Gabryelewicz T, Pfeffer A, Chodakowska M, Luczywek E, Wasiaik B, Stepień K, Golebiowski M, Winblad B, Barcikowska M. Homocysteine, apolipoproteine E and methylenetetrahydrofolate reductase in Alzheimer's disease and mild cognitive impairment. *Dement Geriatr Cogn Disord.* 2003; 16:64–70.  
<https://doi.org/10.1159/000070677> PMID:[12784029](https://pubmed.ncbi.nlm.nih.gov/12784029/)
7. Duan H, Zhou D, Xu N, Yang T, Wu Q, Wang Z, Sun Y, Li Z, Li W, Ma F, Chen Y, Du Y, Zhang M, et al. Association of Unhealthy Lifestyle and Genetic Risk Factors With Mild Cognitive Impairment in Chinese Older Adults. *JAMA Netw Open.* 2023; 6:e2324031.  
<https://doi.org/10.1001/jamanetworkopen.2023.24031> PMID:[37462970](https://pubmed.ncbi.nlm.nih.gov/37462970/)
8. Jin X, He W, Zhang Y, Gong E, Niu Z, Ji J, Li Y, Zeng Y, Yan LL. Association of APOE ε4 genotype and lifestyle

- with cognitive function among Chinese adults aged 80 years and older: A cross-sectional study. *PLoS Med.* 2021; 18:e1003597.  
<https://doi.org/10.1371/journal.pmed.1003597>  
PMID:[34061824](https://pubmed.ncbi.nlm.nih.gov/34061824/)
9. Dhana K, Evans DA, Rajan KB, Bennett DA, Morris MC. Healthy lifestyle and the risk of Alzheimer dementia: Findings from 2 longitudinal studies. *Neurology.* 2020; 95:e374–83.  
<https://doi.org/10.1212/WNL.0000000000009816>  
PMID:[32554763](https://pubmed.ncbi.nlm.nih.gov/32554763/)
  10. Jia L, Du Y, Chu L, Zhang Z, Li F, Lyu D, Li Y, Li Y, Zhu M, Jiao H, Song Y, Shi Y, Zhang H, et al. and COAST Group. Prevalence, risk factors, and management of dementia and mild cognitive impairment in adults aged 60 years or older in China: a cross-sectional study. *Lancet Public Health.* 2020; 5:e661–71.  
[https://doi.org/10.1016/S2468-2667\(20\)30185-7](https://doi.org/10.1016/S2468-2667(20)30185-7)  
PMID:[33271079](https://pubmed.ncbi.nlm.nih.gov/33271079/)
  11. Katayama O, Lee S, Bae S, Makino K, Shinkai Y, Chiba I, Harada K, Shimada H. Lifestyle changes and outcomes of older adults with mild cognitive impairment: A 4-year longitudinal study. *Arch Gerontol Geriatr.* 2021; 94:104376.  
<https://doi.org/10.1016/j.archger.2021.104376>  
PMID:[33588157](https://pubmed.ncbi.nlm.nih.gov/33588157/)
  12. DeCarlo CA, MacDonald SW, Vergote D, Jhamandas J, Westaway D, Dixon RA. Vascular Health and Genetic Risk Affect Mild Cognitive Impairment Status and 4-Year Stability: Evidence From the Victoria Longitudinal Study. *J Gerontol B Psychol Sci Soc Sci.* 2016; 71:1004–14.  
<https://doi.org/10.1093/geronb/gbv043>  
PMID:[26362601](https://pubmed.ncbi.nlm.nih.gov/26362601/)
  13. Fu J, Liu Q, Du Y, Zhu Y, Sun C, Lin H, Jin M, Ma F, Li W, Liu H, Zhang X, Chen Y, Sun Z, et al. Age- and Sex-Specific Prevalence and Modifiable Risk Factors of Mild Cognitive Impairment Among Older Adults in China: A Population-Based Observational Study. *Front Aging Neurosci.* 2020; 12:578742.  
<https://doi.org/10.3389/fnagi.2020.578742>  
PMID:[33192471](https://pubmed.ncbi.nlm.nih.gov/33192471/)
  14. Feng YA, Chen CY, Chen TT, Kuo PH, Hsu YH, Yang HI, Chen WJ, Su MW, Chu HW, Shen CY, Ge T, Huang H, Lin YF. Taiwan Biobank: A rich biomedical research database of the Taiwanese population. *Cell Genom.* 2022; 2:100197.  
<https://doi.org/10.1016/j.xgen.2022.100197>  
PMID:[36776991](https://pubmed.ncbi.nlm.nih.gov/36776991/)
  15. Katzman R, Zhang MY, Ou, Wang ZY, Liu WT, Yu E, Wong SC, Salmon DP, Grant I. A Chinese version of the Mini-Mental State Examination; impact of illiteracy in a Shanghai dementia survey. *J Clin Epidemiol.* 1988; 41:971–8.  
[https://doi.org/10.1016/0895-4356\(88\)90034-0](https://doi.org/10.1016/0895-4356(88)90034-0)  
PMID:[3193141](https://pubmed.ncbi.nlm.nih.gov/3193141/)
  16. Hiraike Y, Yang CT, Liu WJ, Yamada T, Lee CL. FTO Obesity Variant-Exercise Interaction on Changes in Body Weight and BMI: The Taiwan Biobank Study. *J Clin Endocrinol Metab.* 2021; 106:e3673–81.  
<https://doi.org/10.1210/clinem/dgab295>  
PMID:[33929497](https://pubmed.ncbi.nlm.nih.gov/33929497/)
  17. Piercy KL, Troiano RP, Ballard RM, Carlson SA, Fulton JE, Galuska DA, George SM, Olson RD. The Physical Activity Guidelines for Americans. *JAMA.* 2018; 320:2020–8.  
<https://doi.org/10.1001/jama.2018.14854>  
PMID:[30418471](https://pubmed.ncbi.nlm.nih.gov/30418471/)
  18. Folstein MF, Folstein SE, McHugh PR. “Mini-mental state”. A practical method for grading the cognitive state of patients for the clinician. *J Psychiatr Res.* 1975; 12:189–98.  
[https://doi.org/10.1016/0022-3956\(75\)90026-6](https://doi.org/10.1016/0022-3956(75)90026-6)  
PMID:[1202204](https://pubmed.ncbi.nlm.nih.gov/1202204/)
  19. Petersen RC, Lopez O, Armstrong MJ, Getchius TSD, Ganguli M, Gloss D, Gronseth GS, Marson D, Pringsheim T, Day GS, Sager M, Stevens J, Rae-Grant A. Practice guideline update summary: Mild cognitive impairment: Report of the Guideline Development, Dissemination, and Implementation Subcommittee of the American Academy of Neurology. *Neurology.* 2018; 90:126–35.  
<https://doi.org/10.1212/WNL.0000000000004826>  
PMID:[29282327](https://pubmed.ncbi.nlm.nih.gov/29282327/)
  20. Sun Y, Lee HJ, Yang SC, Chen TF, Lin KN, Lin CC, Wang PN, Tang LY, Chiu MJ. A nationwide survey of mild cognitive impairment and dementia, including very mild dementia, in Taiwan. *PLoS One.* 2014; 9:e100303.  
<https://doi.org/10.1371/journal.pone.0100303>  
PMID:[24940604](https://pubmed.ncbi.nlm.nih.gov/24940604/)
  21. Liu Y, Yu X, Han P, Chen X, Wang F, Lian X, Li J, Li R, Wang B, Xu C, Li J, Zheng Y, Zhang Z, et al. Gender-specific prevalence and risk factors of mild cognitive impairment among older adults in Chongming, Shanghai, China. *Front Aging Neurosci.* 2022; 14:900523.  
<https://doi.org/10.3389/fnagi.2022.900523>  
PMID:[36118698](https://pubmed.ncbi.nlm.nih.gov/36118698/)
  22. Cotman CW, Berchtold NC. Exercise: a behavioral intervention to enhance brain health and plasticity. *Trends Neurosci.* 2002; 25:295–301.  
[https://doi.org/10.1016/s0166-2236\(02\)02143-4](https://doi.org/10.1016/s0166-2236(02)02143-4)  
PMID:[12086747](https://pubmed.ncbi.nlm.nih.gov/12086747/)
  23. Cotman CW, Berchtold NC, Christie LA. Exercise builds brain health: key roles of growth factor

- cascades and inflammation. *Trends Neurosci.* 2007; 30:464–72.  
<https://doi.org/10.1016/j.tins.2007.06.011>  
 PMID:[17765329](https://pubmed.ncbi.nlm.nih.gov/17765329/)
24. Chang M, Jonsson PV, Snaedal J, Bjornsson S, Saczynski JS, Aspelund T, Eiriksdottir G, Jonsdottir MK, Lopez OL, Harris TB, Gudnason V, Launer LJ. The effect of midlife physical activity on cognitive function among older adults: AGES--Reykjavik Study. *J Gerontol A Biol Sci Med Sci.* 2010; 65:1369–74.  
<https://doi.org/10.1093/gerona/glq152>  
 PMID:[20805238](https://pubmed.ncbi.nlm.nih.gov/20805238/)
  25. Dik M, Deeg DJ, Visser M, Jonker C. Early life physical activity and cognition at old age. *J Clin Exp Neuropsychol.* 2003; 25:643–53.  
<https://doi.org/10.1076/jcen.25.5.643.14583>  
 PMID:[12815502](https://pubmed.ncbi.nlm.nih.gov/12815502/)
  26. Colcombe SJ, Kramer AF, Erickson KI, Scalf P, McAuley E, Cohen NJ, Webb A, Jerome GJ, Marquez DX, Elavsky S. Cardiovascular fitness, cortical plasticity, and aging. *Proc Natl Acad Sci USA.* 2004; 101:3316–21.  
<https://doi.org/10.1073/pnas.0400266101>  
 PMID:[14978288](https://pubmed.ncbi.nlm.nih.gov/14978288/)
  27. Barha CK, Liu-Ambrose T. Exercise and the Aging Brain: Considerations for Sex Differences. *Brain Plast.* 2018; 4:53–63.  
<https://doi.org/10.3233/BPL-180067> PMID:[30564546](https://pubmed.ncbi.nlm.nih.gov/30564546/)
  28. Duzel E, van Praag H, Sendtner M. Can physical exercise in old age improve memory and hippocampal function? *Brain.* 2016; 139:662–73.  
<https://doi.org/10.1093/brain/awv407>  
 PMID:[26912638](https://pubmed.ncbi.nlm.nih.gov/26912638/)
  29. Voss MW, Vivar C, Kramer AF, van Praag H. Bridging animal and human models of exercise-induced brain plasticity. *Trends Cogn Sci.* 2013; 17:525–44.  
<https://doi.org/10.1016/j.tics.2013.08.001>  
 PMID:[24029446](https://pubmed.ncbi.nlm.nih.gov/24029446/)
  30. Barha CK, Hsiung GR, Best JR, Davis JC, Eng JJ, Jacova C, Lee PE, Munkacsy M, Cheung W, Liu-Ambrose T. Sex Difference in Aerobic Exercise Efficacy to Improve Cognition in Older Adults with Vascular Cognitive Impairment: Secondary Analysis of a Randomized Controlled Trial. *J Alzheimers Dis.* 2017; 60:1397–410.  
<https://doi.org/10.3233/JAD-170221> PMID:[29036816](https://pubmed.ncbi.nlm.nih.gov/29036816/)
  31. Kiuchi Y, Doi T, Tsutsumimoto K, Nakakubo S, Kurita S, Nishimoto K, Makizako H, Shimada H. Association between dietary diversity and cognitive impairment in community-dwelling older adults. *Geriatr Gerontol Int.* 2024; 24:75–81.  
<https://doi.org/10.1111/ggi.14762> PMID:[38115645](https://pubmed.ncbi.nlm.nih.gov/38115645/)
  32. Chao AM, Loughhead J, Bakizada ZM, Hopkins CM, Geliebter A, Gur RC, Wadden TA. Sex/gender differences in neural correlates of food stimuli: a systematic review of functional neuroimaging studies. *Obes Rev.* 2017; 18:687–99.  
<https://doi.org/10.1111/obr.12527>  
 PMID:[28371180](https://pubmed.ncbi.nlm.nih.gov/28371180/)
  33. Ozawa M, Ninomiya T, Ohara T, Hirakawa Y, Doi Y, Hata J, Uchida K, Shirota T, Kitazono T, Kiyohara Y. Self-reported dietary intake of potassium, calcium, and magnesium and risk of dementia in the Japanese: the Hisayama Study. *J Am Geriatr Soc.* 2012;60:1515–20.  
<https://doi.org/10.1111/j.1532-5415.2012.04061.x>  
 PMID:[22860881](https://pubmed.ncbi.nlm.nih.gov/22860881/)
  34. Kinoshita K, Otsuka R, Takada M, Tsukamoto-Yasui M, Nishita Y, Tange C, Tomida M, Shimokata H, Kuzuya M, Imaizumi A, Arai H. The Association between Dietary Amino Acid Intake and Cognitive Decline 8 Years Later in Japanese Community-Dwelling Older Adults. *J Nutr Health Aging.* 2021;25:165–71.  
<https://doi.org/10.1007/s12603-020-1470-9>  
 PMID:[33491030](https://pubmed.ncbi.nlm.nih.gov/33491030/)
  35. Tsurumaki N, Zhang S, Tomata Y, Abe S, Sugawara Y, Matsuyama S, Tsuji I. Fish consumption and risk of incident dementia in elderly Japanese: the Ohsaki cohort 2006 study. *Br J Nutr.* 2019;122:1182–91.  
<https://doi.org/10.1017/S0007114519002265>  
 PMID:[31477191](https://pubmed.ncbi.nlm.nih.gov/31477191/)
  36. Deal JA, Power MC, Palta P, Alonso A, Schneider ALC, Perryman K, Bandeen-Roche K, Sharrett AR. Relationship of Cigarette Smoking and Time of Quitting with Incident Dementia and Cognitive Decline. *J Am Geriatr Soc.* 2020; 68:337–45.  
<https://doi.org/10.1111/jgs.16228> PMID:[31675113](https://pubmed.ncbi.nlm.nih.gov/31675113/)
  37. Anstey KJ, von Sanden C, Salim A, O’Kearney R. Smoking as a risk factor for dementia and cognitive decline: a meta-analysis of prospective studies. *Am J Epidemiol.* 2007; 166:367–78.  
<https://doi.org/10.1093/aje/kwm116> PMID:[17573335](https://pubmed.ncbi.nlm.nih.gov/17573335/)
  38. Solfrizzi V, Panza F, Imbimbo BP, D’Introno A, Galluzzo L, Gandin C, Misciagna G, Guerra V, Osella A, Baldereschi M, Di Carlo A, Inzitari D, Seripa D, et al, and Italian Longitudinal Study on Aging Working Group. Coffee Consumption Habits and the Risk of Mild Cognitive Impairment: The Italian Longitudinal Study on Aging. *J Alzheimers Dis.* 2015; 47:889–99.  
<https://doi.org/10.3233/JAD-150333> PMID:[26401769](https://pubmed.ncbi.nlm.nih.gov/26401769/)
  39. Gómez-Pinilla F. Brain foods: the effects of nutrients on brain function. *Nat Rev Neurosci.* 2008; 9:568–78.  
<https://doi.org/10.1038/nrn2421> PMID:[18568016](https://pubmed.ncbi.nlm.nih.gov/18568016/)
  40. Olivera-Pueyo J, Pelegrín-Valero C. Dietary supplements for cognitive impairment. *Actas Esp Psiquiatr.* 2017 (Supplement); 45:37–47.  
 PMID:[29171642](https://pubmed.ncbi.nlm.nih.gov/29171642/)

## SUPPLEMENTARY MATERIALS

### Supplementary Tables

**Supplementary Table 1. The dietary patterns were derived from structured questionnaire through principal components analysis.**

|                                                                                                                                                                                            | Rotation component matrix <sup>a</sup> |        |      |
|--------------------------------------------------------------------------------------------------------------------------------------------------------------------------------------------|----------------------------------------|--------|------|
|                                                                                                                                                                                            | Dietary ingredients                    |        |      |
|                                                                                                                                                                                            | Meat                                   | Flavor | Fats |
| Do you choose to eat lean meat instead of pork belly or pork knuckle?                                                                                                                      | .720                                   |        |      |
| Do you try to eat meat with lower fat content such as fish or chicken instead of meat with higher fat content such as pork or beef?                                                        | .704                                   |        |      |
| When you eat meat, do you choose to eat meat that is cooked in a braised or roasted way (e.g., braised or roasted chicken drumsticks) instead of fried meat (e.g., fried chicken cutlets)? | .662                                   |        |      |
| Do you eat poultry/meat as fewer as possible?                                                                                                                                              | .656                                   |        |      |
| Do you add salt, soy sauce, soy paste, pepper salt, chili sauce or other seasonings to your meals?                                                                                         |                                        | .652   |      |
| Do you accompany your meals with pickled vegetables, fermented tofu and fermented soybeans?                                                                                                |                                        | .601   |      |
| Do you eat noodles/rice with lard or fried vegetables?                                                                                                                                     |                                        | .583   |      |
| Do you fry bean products (tofu, bean curd) before eating?                                                                                                                                  |                                        | .548   |      |
| Do you spread cream, butter, or mayonnaise on bread before eating?                                                                                                                         |                                        | .536   |      |
| Do you cook meat/fish with oil?                                                                                                                                                            |                                        |        | .732 |
| Do you eat meat together with the skin?                                                                                                                                                    |                                        |        | .666 |
| Do you fry vegetables before eating?                                                                                                                                                       |                                        |        | .610 |

Extraction method: Principal component analysis.

Rotation method: Using Kaiser's normal varimax.

<sup>a</sup>: Rotation to converge in 4 iterations.

The responses to these questions were presented on a five-point scale (1 = never, 2 = seldom, 3 = sometimes, 4 = frequently, and 5 = always).

**Supplementary Table 2. Various types of physical activity and metabolic equivalent of tasks (METs).**

|                      |          |                 |          |              |          |                   |          |
|----------------------|----------|-----------------|----------|--------------|----------|-------------------|----------|
| Walking              | 3.3 METs | Wai-Tan-Kung    | 3.8 METs | Badminton    | 5.2 METs | Aerobic dance     | 5.0 METs |
| Jogging              | 3.8 METs | Neidan          | 3.8 METs | Table tennis | 4.9 METs | Folk Dance        | 4.5 METs |
| Brisk walking        | 5.0 METs | Falun Gong      | 3.8 METs | Foot ball    | 9.0 METs | Bicycling         | 6.0 METs |
| Rope skipping        | 8.0 METs | Yuan Chih Dance | 3.8 METs | Golf         | 3.8 METs | Hiking            | 4.0 METs |
| Swimming             | 4.0 METs | Tai Chi         | 3.8 METs | Croquet      | 2.5 METs | Strength training | 4.5 METs |
| Gymnastics           | 4.0 METs | Xiang Gong      | 3.8 METs | Tennis       | 7.0 METs | Climbing stairs   | 5.0 METs |
| Swing hands exercise | 2.5 METs | Yoga            | 2.5 METs | Basketball   | 6.0 METs | Hula hoop         | 3.5 METs |

The metabolic equivalent of task (MET) was calculated with reference to the study by Hiraike et al. [16].

**Supplementary Table 3. The cross-table analysis of physical activity intensity levels and accumulation for MCI.**

|                                |                | Physical activity intensity                  |                                               |                                              |
|--------------------------------|----------------|----------------------------------------------|-----------------------------------------------|----------------------------------------------|
|                                |                | N (%), OR (95% CI)                           |                                               |                                              |
|                                |                | Group1                                       | Group 2                                       | Group 3                                      |
| Physical activity accumulation | > 20 METs/week | N = 47 (0.1%)<br>OR = 1.02 (0.43 - 2.40)     | N = 6,671 (20.3%)<br>OR = 0.91 (0.83 - 0.99)* | N = 1,337 (4.1%)<br>OR = 0.82 (0.68 - 0.98)* |
|                                | ≤ 20 METs/week | N = 1,105 (3.4%)<br>OR = 0.81 (0.66 - 0.98)* | N = 6,274 (19.1%)<br>OR = 0.80 (0.73 - 0.88)* | N = 497 (1.5%)<br>OR = 0.94 (0.71 - 1.23)    |
|                                | None           | N = 16,952 (51.6%)<br>Ref.                   | NA                                            | NA                                           |

<sup>a</sup>Group 1: no exercise habit or only conduct light-intensity physical activity (<3 MET/hr).

Group 2: conduct physical activities including moderate-intensity physical activity (3-5.9 MET/hr).

Group 3: conduct physical activity including vigorous-intensity physical activity (≥6 MET/hr).

\*p < 0.05.
