# Supplementary material for: Gender-specification lifestyle factors associated with mild cognitive impairment among young-old adults in Taiwan
Source: publisher site journal article supplement (doi:10.18632/aging.206172), 2024-12-10
Supplement: Supplementary file [file aging-v16i22-206172-supplementary-material-SD1.pdf]

## SUPPLEMENTARY TABLES

**Supplementary Table 1. The dietary patterns were derived from structured questionnaire through principal components analysis.**

|                                                                                                                                                                                            | Rotation component matrix <sup>a</sup> |        |      |
|--------------------------------------------------------------------------------------------------------------------------------------------------------------------------------------------|----------------------------------------|--------|------|
|                                                                                                                                                                                            | Dietary ingredients                    |        |      |
|                                                                                                                                                                                            | Meat                                   | Flavor | Fats |
| Do you choose to eat lean meat instead of pork belly or pork knuckle?                                                                                                                      | .720                                   |        |      |
| Do you try to eat meat with lower fat content such as fish or chicken instead of meat with higher fat content such as pork or beef?                                                        | .704                                   |        |      |
| When you eat meat, do you choose to eat meat that is cooked in a braised or roasted way (e.g., braised or roasted chicken drumsticks) instead of fried meat (e.g., fried chicken cutlets)? | .662                                   |        |      |
| Do you eat poultry/meat as fewer as possible?                                                                                                                                              | .656                                   |        |      |
| Do you add salt, soy sauce, soy paste, pepper salt, chili sauce or other seasonings to your meals?                                                                                         |                                        | .652   |      |
| Do you accompany your meals with pickled vegetables, fermented tofu and fermented soybeans?                                                                                                |                                        | .601   |      |
| Do you eat noodles/rice with lard or fried vegetables?                                                                                                                                     |                                        | .583   |      |
| Do you fry bean products (tofu, bean curd) before eating?                                                                                                                                  |                                        | .548   |      |
| Do you spread cream, butter, or mayonnaise on bread before eating?                                                                                                                         |                                        | .536   |      |
| Do you cook meat/fish with oil?                                                                                                                                                            |                                        |        | .732 |
| Do you eat meat together with the skin?                                                                                                                                                    |                                        |        | .666 |
| Do you fry vegetables before eating?                                                                                                                                                       |                                        |        | .610 |

Extraction method: Principal component analysis.

Rotation method: Using Kaiser's normal varimax.

<sup>a</sup>: Rotation to converge in 4 iterations.

The responses to these questions were presented on a five-point scale (1 = never, 2 = seldom, 3 = sometimes, 4 = frequently, and 5 = always).

**Supplementary Table 2. Various types of physical activity and metabolic equivalent of tasks (METs).**

|                      |          |                 |          |              |          |                   |          |
|----------------------|----------|-----------------|----------|--------------|----------|-------------------|----------|
| Walking              | 3.3 METs | Wai-Tan-Kung    | 3.8 METs | Badminton    | 5.2 METs | Aerobic dance     | 5.0 METs |
| Jogging              | 3.8 METs | Neidan          | 3.8 METs | Table tennis | 4.9 METs | Folk Dance        | 4.5 METs |
| Brisk walking        | 5.0 METs | Falun Gong      | 3.8 METs | Foot ball    | 9.0 METs | Bicycling         | 6.0 METs |
| Rope skipping        | 8.0 METs | Yuan Chih Dance | 3.8 METs | Golf         | 3.8 METs | Hiking            | 4.0 METs |
| Swimming             | 4.0 METs | Tai Chi         | 3.8 METs | Croquet      | 2.5 METs | Strength training | 4.5 METs |
| Gymnastics           | 4.0 METs | Xiang Gong      | 3.8 METs | Tennis       | 7.0 METs | Climbing stairs   | 5.0 METs |
| Swing hands exercise | 2.5 METs | Yoga            | 2.5 METs | Basketball   | 6.0 METs | Hula hoop         | 3.5 METs |

The metabolic equivalent of task (MET) was calculated with reference to the study by Hiraike et al. [16].

**Supplementary Table 3. The cross-table analysis of physical activity intensity levels and accumulation for MCI.**

|                                   |                | Physical activity intensity<br>N (%), OR (95% CI) |                                               |                                              |
|-----------------------------------|----------------|---------------------------------------------------|-----------------------------------------------|----------------------------------------------|
|                                   |                | Group1                                            | Group 2                                       | Group 3                                      |
| Physical activity<br>accumulation | > 20 METs/week | N = 47 (0.1%)<br>OR = 1.02 (0.43 - 2.40)          | N = 6,671 (20.3%)<br>OR = 0.91 (0.83 - 0.99)* | N = 1,337 (4.1%)<br>OR = 0.82 (0.68 - 0.98)* |
|                                   | ≤ 20 METs/week | N = 1,105 (3.4%)<br>OR = 0.81 (0.66 - 0.98)*      | N = 6,274 (19.1%)<br>OR = 0.80 (0.73 - 0.88)* | N = 497 (1.5%)<br>OR = 0.94 (0.71 - 1.23)    |
|                                   | None           | N = 16,952 (51.6%)<br>Ref.                        | NA                                            | NA                                           |

<sup>a</sup>Group 1: no exercise habit or only conduct light-intensity physical activity (<3 MET/hr).

Group 2: conduct physical activities including moderate-intensity physical activity (3-5.9 MET/hr).

Group 3: conduct physical activity including vigorous-intensity physical activity (≥6 MET/hr).

\*p < 0.05.
